# Supplementary material
Source: Springer Nature journal article supplement (https://www.springermedizin.de/resource/supplementary/12891_2007_379_MOESM6_ESM.pdf/9510924)
Supplement: MOESM6 [file 9510924]

True positive rate

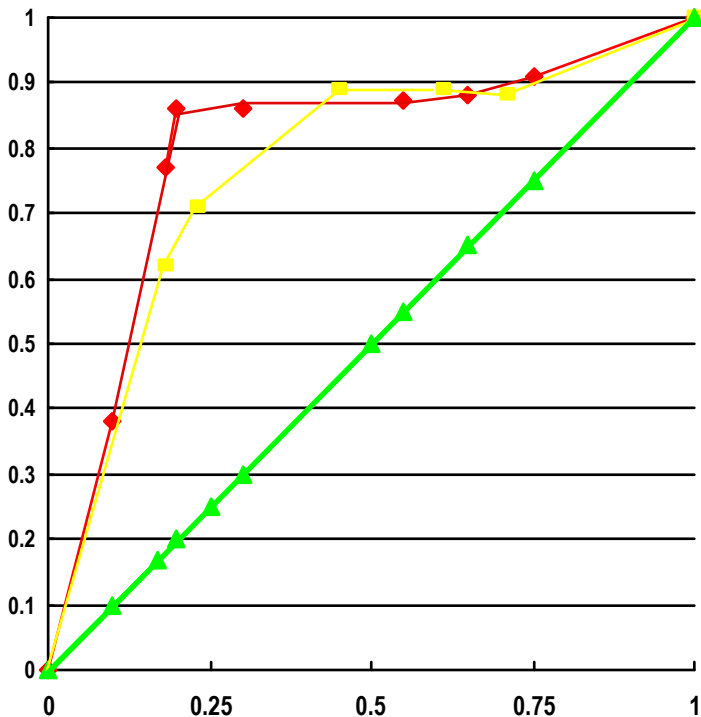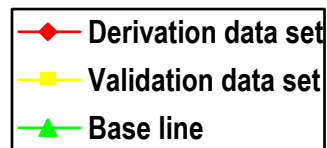

False positive rate

Derivation Data Set : ROC Area=0.797 (95%CI, 0.714-0.862)

Validation Data Set : ROC Area=0.782 (95%CI, 0.685-0.869)
